# Supplementary material for: Colchicine Effectiveness and Safety in Periodic Fever, Aphthous Stomatitis, Pharyngitis, and Adenitis
Source: PubMed Central journal article supplement (PMC8655689; doi:10.3389/fped.2021.759664), 2021-11-25
Supplement: Table_1.pdf [file Table_1.pdf]

## Supplementary Material

### 1 Supplementary Data

Table S1: Upper limit of reference

| Laboratory value                          | Unit  | Upper limit of reference |
|-------------------------------------------|-------|--------------------------|
| Aspartate-Aminotransferase (ASAT)         | U/L   | 59                       |
| Alanine-Aminotransferase (ALAT)           | U/L   | 39                       |
| Gamma-Glutamyltransferase ( $\gamma$ -GT) | U/L   | 25                       |
| Bilirubin (BL)                            | mg/dl | 1                        |
| Lactate-Dehydrogenase (LDH)               | U/L   | 299                      |
| creatinine                                | mg/dl | 0.6                      |

**Abbreviations:** *U* units, *L* liters; *mg* milligram, *dl* deciliters
